# Supplementary material for: TIF1γ interferes with TGFβ1/SMAD4 signaling to promote poor outcome in operable breast cancer patients
Source: BMC Cancer. 2015 Jun 4;15:453. doi: 10.1186/s12885-015-1471-y (PMC4453047; doi:10.1186/s12885-015-1471-y)
Supplement: Additional file 1: Table S1. — Clinicopathological characteristics and biomarker expression in the tested patients’ population (248 patients). Table S2: Absence of correlations between expression of TGFβ1, TIF1Ɣ, cytoplasmic and nuclear SMAD4. *Correlations tested by Pearson’s Chi square test. Figure S1: A flowchart of the whole population and subsets tested for different biomarkers. [file 12885_2015_1471_MOESM1_ESM.pdf]

| Characteristic                    |                     | Number | percent |
|-----------------------------------|---------------------|--------|---------|
| Age group                         | <i>≤ 50 years</i>   | 78     | 31.5%   |
|                                   | <i>&gt;50 years</i> | 170    | 68.5%   |
| Tumor size                        | <i>≤2cm</i>         | 126    | 50.8%   |
|                                   | <i>&gt;2cm</i>      | 122    | 49.2%   |
| Axillary LN metastasis            | <i>No</i>           | 136    | 54.8%   |
|                                   | <i>Yes</i>          | 112    | 45.2%   |
| SBR grade                         | <i>I</i>            | 48     | 19.4%   |
|                                   | <i>II</i>           | 116    | 46.8%   |
|                                   | <i>III</i>          | 84     | 33.9%   |
| ER status                         | <i>Negative</i>     | 36     | 14.6%   |
|                                   | <i>Positive</i>     | 210    | 85.4%   |
|                                   | <i>Missing</i>      | 2      |         |
| PR status                         | <i>Negative</i>     | 60     | 24.5%   |
|                                   | <i>Positive</i>     | 185    | 75.5%   |
|                                   | <i>Missing</i>      | 3      |         |
| Her2 status                       | <i>Negative</i>     | 217    | 90%     |
|                                   | <i>Positive</i>     | 24     | 10%     |
|                                   | <i>Missing</i>      | 7      |         |
| Adjuvant Hormonal treatment       | <i>No</i>           | 56     | 22.6%   |
|                                   | <i>Yes</i>          | 192    | 77.4%   |
| Adjuvant (or neoadj) chemotherapy | <i>No</i>           | 108    | 43.5%   |
|                                   | <i>Yes</i>          | 140    | 56.5%   |
| TIF1 $\gamma$                     | <i>Low</i>          | 143    | 64.1%   |
|                                   | <i>High</i>         | 80     | 35.9%   |
|                                   | <i>Missing</i>      | 25     |         |
| TGF $\beta$ 1                     | <i>Low</i>          | 142    | 69.6%   |
|                                   | <i>High</i>         | 62     | 30.4%   |
|                                   | <i>Missing</i>      | 44     |         |
| Nuclear SMAD4                     | <i>Low</i>          | 125    | 72.3%   |
|                                   | <i>High</i>         | 48     | 27.7%   |
|                                   | <i>Missing</i>      | 75     |         |
| Cytoplasmic SMAD4                 | <i>Low</i>          | 82     | 47.4%   |
|                                   | <i>High</i>         | 91     | 52.6%   |
|                                   | <i>Missing</i>      | 75     |         |

*Table S1: Clinicopathological characteristics and biomarker expression in the tested patients' population (248 patients)*

| Marker                        |      | TIF1 $\gamma$ low |         | TIF1 $\gamma$ high |         | P value* | TGF $\beta$ 1 low |         | TGF $\beta$ 1 high |         | P value* |
|-------------------------------|------|-------------------|---------|--------------------|---------|----------|-------------------|---------|--------------------|---------|----------|
|                               |      | No.               | (%)     | No.                | (%)     |          | No.               | (%)     | No.                | (%)     |          |
| <b>Nuclear SMAD 4</b>         | Low  | 66                | (71.7%) | 46                 | (73%)   | P=0.86   | 85                | (75.2%) | 27                 | (67.5%) | P=0.34   |
|                               | High | 26                | (28.3%) | 17                 | (27%)   |          | 28                | (24.8%) | 13                 | (32.5%) |          |
| <b>Cytopl. SMAD4</b>          | Low  | 40                | (43.5%) | 31                 | (49.2%) | P=0.48   | 50                | (44.2%) | 19                 | (47.5%) | P=0.7    |
|                               | High | 52                | (56.5%) | 32                 | (50.8%) |          | 63                | (55.8%) | 21                 | (52.5%) |          |
| <b>SMAD loss</b>              | Yes  | 33                | (35.9%) | 27                 | (42.9%) | P=0.38   | 45                | (39.8%) | 15                 | (37.5%) | P=0.8    |
|                               | No   | 59                | (64.1%) | 36                 | (57.1%) |          | 68                | (60.2%) | 25                 | (62.5%) |          |
| <b>TGF<math>\beta</math>1</b> | Low  | 81                | (70.4%) | 47                 | (68.1%) | P=0.74   |                   |         |                    |         |          |
|                               | high | 34                | (29.6%) | 22                 | (31.9%) |          |                   |         |                    |         |          |

*Table S2: Absence of correlations between expression of TGF $\beta$ 1, TIF1 $\gamma$ , cytoplasmic and nuclear SMAD4.*

*\*Correlations tested by Pearson's Chi square test*

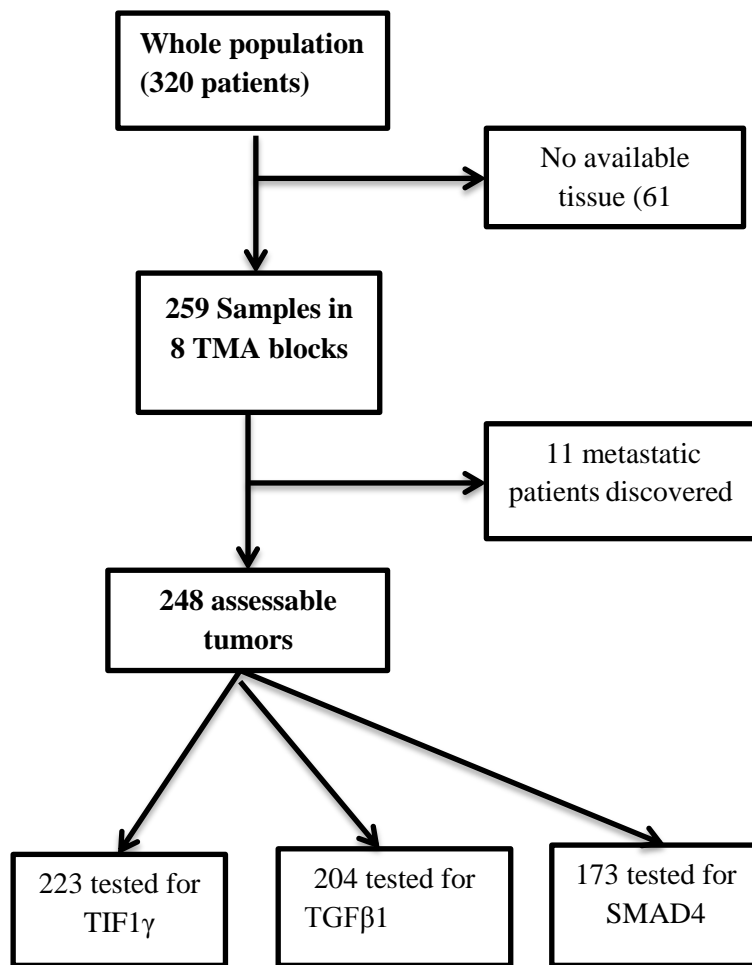

Figure S1: A flowchart of the whole population and subsets tested for different biomarkers
